# Supplementary material
Source: Research Square preprint supplement (doi:10.21203/rs.3.rs-7968242/v1)
Supplement: Supplementary file 1 [file 854d53aefad8ab168e30bc4a.docx]

**Supplementary Information**

**The effect of surfactants on the formation and stability of silica-PEO based shake gels**

*Devajyoti Banerjee 1,2 *, Adrielle Sousa Santos 1 and Paul F. Luckham 1**

*1Department of Chemical Engineering, Imperial College London, London, SW7 2AZ, United Kingdom.*

*2Department of Chemical and Biomolecular Engineering, University of California Los Angeles, California, 90095, USA*

***Corresponding author’s****: Paul F. Luckham (*[*p.luckham01@imperial.ac.uk*](mailto:p.luckham01@imperial.ac.uk)*), Devajyoti Banerjee (*[*devajyotib@g.ucla.edu*](mailto:devajyotib@g.ucla.edu)*,* [*devajyotib.chem@gmail.com*](mailto:devajyotib.chem@gmail.com)*)*





**Figure S1:** Plot of the absolute viscosity data at a shear rate of 1s-1 versus time for the relaxation of the gel at various SDS concentrations.





**Figure S2:** Plot of the absolute data for storage modulus at a shear strain of 0.1 and a frequency of 1Hz versus time for the relaxation of the gel at various SDS concentrations.





**Figure S3:** Plot of the absolute data for loss modulus at a shear strain of 0.1 and a frequency of 1Hz versus time for the relaxation of the gel at various SDS concentrations.





**Figure S4:** Plot of the absolute viscosity data at a shear rate of 1s -1 versus time for the relaxation of the gel at various Triton X-100 concentrations.





**Figure S5:** Plot of the absolute data for storage modulus at a shear strain of 0.1 and a frequency of 1Hz versus time for the relaxation of the gel at various Triton concentrations.





**Figure S6:** Plot of the absolute data for loss modulus at a shear strain of 0.1 and a frequency of 1Hz versus time for the relaxation of the gel at various Triton concentrations.
