# Supplementary material
Source: Research Square preprint supplement (doi:10.21203/rs.3.rs-7968242/v1)

**Graphical Abstract**


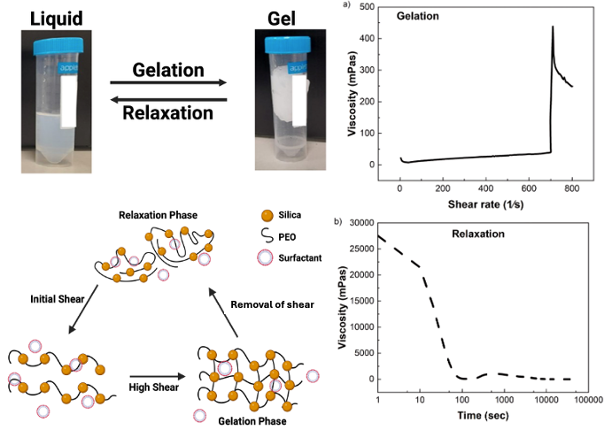

Supplement: Supplementary file 2 [file c4ae15fd31b6771883c58f98.docx]
